# Supplementary material for: Bacteria-derived DNA in serum extracellular vesicles are biomarkers for renal cell carcinoma
Source: PubMed Central journal article supplement (PMC10559165; doi:10.1016/j.heliyon.2023.e19800), 2023-09-06

Figure S1

A

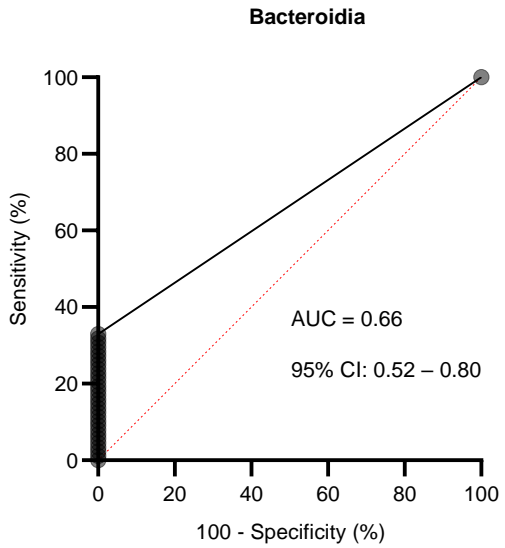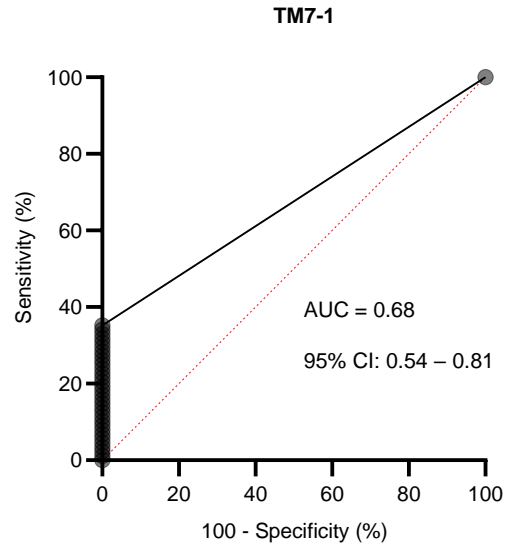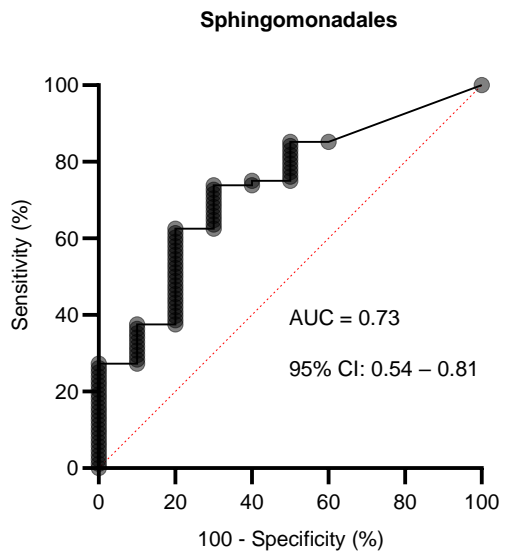

Supplement: mmc1.pdf [file mmc1.pdf]
