# Supplementary material for: Bacteria-derived DNA in serum extracellular vesicles are biomarkers for renal cell carcinoma
Source: PubMed Central journal article supplement (PMC10559165; doi:10.1016/j.heliyon.2023.e19800), 2023-09-06
Supplement: mmc3.pdf [file mmc3.pdf]

**Figure S2**

Relative abundance of Bacteroidia DNA

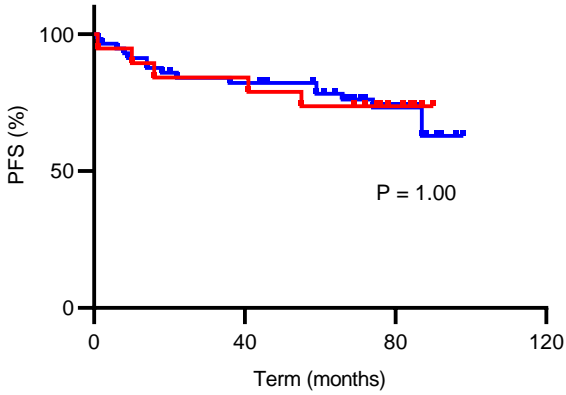

Number at risk:

|      |    |    |    |   |
|------|----|----|----|---|
| Low  | 66 | 46 | 17 | 0 |
| High | 22 | 17 | 10 | 0 |

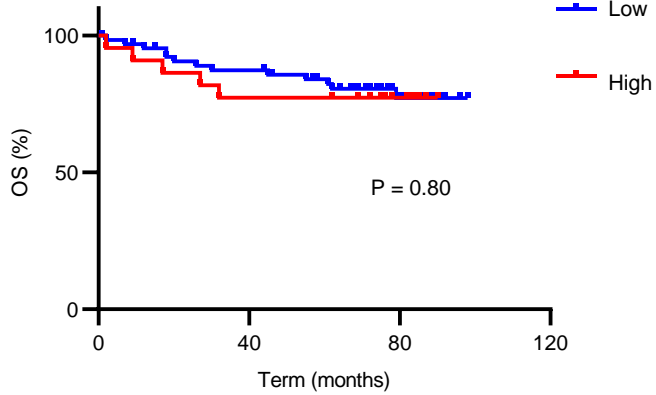

Number at risk:

|      |    |    |    |   |
|------|----|----|----|---|
| Low  | 66 | 55 | 20 | 0 |
| High | 22 | 18 | 12 | 0 |
